# Supplementary material for: Population-wide sampling of retrotransposon insertion polymorphisms using deep sequencing and efficient detection
Source: PubMed Central journal article supplement (PMC5603766; doi:10.1093/gigascience/gix066), 2017-07-31

# 1 Population-wide Sampling of Retrotransposon Insertion

## 2 Polymorphisms Using Deep Sequencing and Efficient

### 3 Detection

4  
5 Qichao Yu<sup>1,2,†</sup>, Wei Zhang<sup>1,2,†</sup>, Xiaolong Zhang<sup>2</sup>, Yongli Zeng<sup>2</sup>, Yeming Wang<sup>2</sup>, Yanhui Wang<sup>2</sup>,  
6 Liqin Xu<sup>2</sup>, Xiaoyun Huang<sup>2</sup>, Nannan Li<sup>2</sup>, Xinlan Zhou<sup>2</sup>, Jie Lu<sup>3</sup>, Xiaosen Guo<sup>2</sup>, Guibo Li<sup>2,4</sup>, Yong  
7 Hou<sup>2,4</sup>, Shiping Liu<sup>2,5,\*</sup> and Bo Li<sup>2,6,\*</sup>

8  
9 <sup>1</sup> BGI Education Center, University of Chinese Academy of Sciences, Shenzhen 518083,  
10 China

11 \* Correspondence: libo@genomics.cn; [liushiping@genomics.cn](mailto:liushiping@genomics.cn)

12 † Equal contributors

13 Full list of author information is available at the end of the article.

#### 14 15 16 **Emails of all authors:**

17 Qichao Yu: [yuqichao@genomics.cn](mailto:yuqichao@genomics.cn) (ORCID: 0000-0003-2158-8424); Wei Zhang:

18 [zhangwei7@genomics.cn](mailto:zhangwei7@genomics.cn) (ORCID: 0000-0002-5792-7662); Xiaolong Zhang: [13528497060@163.com](mailto:13528497060@163.com);

19 Yongli Zeng: [zeoly100@163.com](mailto:zeoly100@163.com); Yeming Wang: [1398738509@qq.com](mailto:1398738509@qq.com) (ORCID:

20 0000-0002-1521-2140); Yanhui Wang: [839584901@qq.com](mailto:839584901@qq.com); Liqin Xu: [xuliqin@genomics.cn](mailto:xuliqin@genomics.cn); Nannan Li:

21 [linannan@genomics.cn](mailto:linannan@genomics.cn) (ORCID: 0000-0003-3632-7964); Xinlan Zhou: [zhouxinlan@genomics.cn](mailto:zhouxinlan@genomics.cn)

22 (ORCID: 0000-0001-9293-0894); Xiaoyun Huang: [huangxiaoyun@genomics.cn](mailto:huangxiaoyun@genomics.cn) (ORCID:

1 23 0000-0002-3389-9759); Jie Lu: lujie1@genomics.cn (ORCID: 0000-0001-7304-2023); Xiaosen Guo:  
2  
3 24 guoxs@genomics.cn (ORCID: 0000-0003-1317-2760); Guibo Li: liguibo@genomics.cn (ORCID:  
4  
5  
6 25 0000-0002-6141-4931); Yong Hou: houyong@genomics.cn (ORCID: 0000-0002-0420-0726); Bo Li:  
7  
8  
9 26 libo@genomics.cn; Shiping Liu: liushiping@genomics.cn (ORCID: 0000-0003-0019-619X).

10  
11 27

12  
13  
14 28 **Abstract**

15  
16 29 **Background:** Active retrotransposons play important roles during evolution and continue to  
17  
18 30 shape our genomes today, especially in genetic polymorphisms underlying a diverse set of  
19  
20 31 diseases. However, studies of human retrotransposon insertion polymorphisms (RIPs) based  
22  
23 32 on whole-genome deep sequencing at the population level have not been sufficiently  
24  
25 33 undertaken, despite the obvious need for a thorough characterization of RIPs in the general  
26  
27 34 population.

28  
29 35 **Findings:** Herein, we present a novel and efficient computational tool named Specific  
30  
31 36 Insertions Detector (SID) for the detection of non-reference RIPs. We demonstrate that SID is  
32  
33 37 suitable for high depth whole-genome sequencing (WGS) data using paired-end reads  
34  
35 38 obtained from simulated and real datasets. We construct a comprehensive RIP database  
36  
37 39 using a large population of 90 Han Chinese individuals with a mean 68x depth per individual.  
38  
39 40 In total, we identify 9342 recent RIPs, and 8433 of these RIPs are novel compared with dbRIP,  
40  
41 41 including 5826 Alu, 2169 long interspersed nuclear element 1 (L1), 383 SVA, and 55 long  
42  
43 42 terminal repeats (LTR). Among the 9342 RIPs, 4828 were located in gene regions and five  
44  
45 43 were located in protein-coding regions. We demonstrate that RIPs can, in principle, be an  
46  
47 44 informative resource to perform population evolution and phylogenetic analyses. Taking the  
48  
49 45 demographic effects into account, we identify a weak negative selection on SVA and L1 but  
50  
51 46 approximately neutral selection for Alu elements based on the frequency spectrum of RIPs.

52  
53 47 **Conclusions:** SID is a powerful open-source program for the detection of non-reference RIPs.  
54  
55 48 We built a non-reference RIP dataset that greatly enhanced the diversity of RIPs detected in  
56  
57 49 the general population and should be invaluable to researchers interested in many aspects of  
58  
59

1  
2  
3  
4  
5  
6  
7  
8  
9  
10  
11  
12  
13  
14  
15  
16  
17  
18  
19  
20  
21  
22  
23  
24  
25  
26  
27  
28  
29  
30  
31  
32  
33  
34  
35  
36  
37  
38  
39  
40  
41  
42  
43  
44  
45  
46  
47  
48  
49  
50  
51  
52  
53  
54  
55  
56  
57  
58  
59  
60  
61  
62  
63  
64  
65  
66  
67  
68  
69  
70  
71  
72  
73  
74  
75  
76  
77  
78  
79  
80  
81  
82  
83  
84  
85  
86  
87  
88  
89  
90  
91  
92  
93  
94  
95  
96  
97  
98  
99  
100

human evolution, genetics, and disease. As a proof-of-concept, we demonstrate that the RIPs can be used as biomarkers in a similar way as single nucleotide polymorphisms (SNPs).

**Keywords:** Transposable element, retrotransposon insertion polymorphism, next-generation sequencing, whole-genome sequencing

## Findings

### Introduction

Transposable elements (TEs) are genomic sequences that can replicate within the genome either autonomously or in conjunction with other TEs, resulting in insertion polymorphisms. Over the evolutionary timescale, this process leads to drastic changes in genomic structure. Current estimates suggest that approximately half of the human genome is derived from TEs [1]. Retrotransposons, which constitute ~93% of TEs [2], can be subdivided into those sequences containing LTRs and those that do not (non-LTR). The majority of human TEs result from the activity of non-LTR retrotransposons, including the L1, Alu and SVA elements, which collectively account for approximately one-third of the human genome [1]. Although most retrotransposons are inactive remnants prevalent among the human population, younger retrotransposons account for much of the structural variation among individual genomes [3]. Only a small proportion of total L1s are highly active [4]. The current rate of retrotransposition in humans has been approximately estimated as 1 for every 20 births for Alu, 1 for every 200 births for L1 and 1 for every 900 births for SVA [5, 6].

Retrotransposon insertion is a disease-causing mechanism [7], and next-generation sequencing (NGS) technology has been widely used to explore the association between retrotransposon insertions and disease, such as cancer [8-10]. In this respect, a comprehensive RIP dataset of a healthy population is necessary to serve as a reference for the identification of disease-related RIPs. Based on the database of the 1000 Genomes Project (1000GP), researchers performed RIP detection on an unprecedented scale and detected thousands of novel RIPs [11-14]. This finding implies that an insertion allele present in multiple individuals would effectively receive high coverage across the pooled dataset,

79 leading to a detection bias toward common insertions. It was previously estimated that at least  
80 30x coverage of sequencing is needed to detect heterozygous RIPs with high sensitivity using  
81 WGS [15].

82 Here, we developed the software SID to detect RIPs, which fulfilled our needs regarding  
83 detection efficiency, accuracy and sensitivity. We also generated a non-reference TE insertion  
84 polymorphism database by employing SID to analyze the whole-genome sequences of 90 Han  
85 Chinese individuals (YH90) acquired at a mean depth of 68x.

## 86 **Materials and methods**

### 87 **Samples and whole genome sequencing**

88 We obtained B-lymphocyte cell lines from 90 Han Chinese individuals at the Coriell Institute  
89 (Camden, New Jersey, USA). These individuals were selected from Beijing, Hunan province  
90 and Fujian province, respectively. We broadly separated the samples into “Northern group” (45  
91 samples) and “Southern group” (45 samples). DNA was extracted from the B-lymphocyte cells  
92 of each individual, and libraries were then constructed following the manufacturer’s  
93 instructions. High-coverage paired-end 100 bp WGS libraries were sequenced on the Illumina  
94 HiSeq 2000 Platform. For more on this dataset see the Data Note describing its production  
95 published alongside this paper [16]. In addition, we also used a Chinese sample [17] for which  
96 the data were previously released in the European Nucleotide Archive (ENA) repository  
97 (Additional file 1: Table S1). The Institutional Review Board on Bioethics and Biosafety of BGI  
98 (BGI-IRB) approved the study.

### 99 **Processing of the WGS data**

100 Reads were aligned to the human genome reference (HG19, Build37) using *BWA* (BWA ,  
101 RRID:SCR\_010910)[18]. Duplications were removed using Picard tools, and the quality values  
102 of each reads were recalibrated using the Genome Analysis Toolkit (GATK)( GATK ,  
103 RRID:SCR\_001876)[19]. The resulting Binary Alignment/Map (BAM) files were used as input  
104 for SID (Additional file 2: Text S1).

### 105 **The specific insertion detector pipeline**



1 106 SID is compiled in Perl and includes the following two steps: discordant reads detection and  
2  
3 107 reads clustering. Generally, the first step collects informative reads and generates other  
4  
5  
6 108 necessary files, whereas the second step discovers the specific insertion sites and exports the  
7  
8  
9 109 final results into plain text.

10  
11 110 *Detection of discordant reads.* The “discordant reads” were extracted for the subsequent  
12  
13  
14 111 clustering step. Paired-end reads were determined as “discordant reads” if they met one of the  
15  
16  
17 112 following criteria: a. one read mapped to HG19 uniquely and the other read mapped to the  
18  
19  
20 113 retrotransposon library (multi-mapped or unmapped to HG19); b. one read mapped to HG19  
21  
22 114 uniquely and the other soft-clipped read mapped to HG19, and the clipped sequence could be  
23  
24  
25 115 mapped to the retrotransposon library; c. one soft-clipped read mapped to HG19, and the  
26  
27  
28 116 clipped sequence could be mapped to the retrotransposon library. The other read mapped to  
29  
30  
31 117 the retrotransposon library (multi-mapped or unmapped to HG19). The retrotransposon library  
32  
33  
34 118 includes objective TE classes, such as L1, Alu, and SVA. In this study, the TE reference  
35  
36  
37 119 database contains known TE sequences collected from RepBase version 17.07 [20], dbRIP  
38  
39 120 [21] and Hot L1s [4]. To reduce the long processing time due to large volumes of WGS data,  
40  
41  
42 121 we implemented a parallel approach to process each bam files of samples simultaneously in  
43  
44  
45 122 the discordant reads detection step.

46  
47 123 *Reads clustering and detection of breakpoints.* First, the “discordant reads” were scanned and  
48  
49  
50 124 clustered into blocks that supported potential RIPs based on the Maximal Valid Clusters  
51  
52  
53 125 algorithm [22]. Second, we extracted all reads located within the cluster regions and  
54  
55  
56 126 determined the breakpoints. Although high-depth, data-enabled RIP detection with high  
57  
58  
59 127 sensitivity was possible given that more soft-clipped reads neighboring target site duplication

1 128 (TSD) could be detected, alignments neighboring the TSDs had apparently lower depth  
2  
3 129 compared with the mean sequencing depth of the whole genome due to occasional  
4  
5  
6 130 sequencing and system errors. This feature made breakpoint detection difficult and increased  
7  
8  
9 131 the false discovery rate (FDR). Thus, we added the recalibration process of clipped points to  
10  
11 132 determine breakpoints. Each read located within the cluster regions flanking potential  
12  
13  
14 133 breakpoints was used to confirm the precise location of the breakpoints. Small deletions were  
15  
16  
17 134 extracted to perform breakpoint recalibration, and the mismatched bases were removed from  
18  
19  
20 135 the deletion sequences.

21  
22 136 The clipped sequences were realigned to local regions on HG19 to determine the actual  
23  
24  
25 137 breakpoints. Breakpoints were assigned as “clips” if greater than half of the new clipped  
26  
27  
28 138 sequences were discordant with the reference sequence and the length of gap within the new  
29  
30  
31 139 clipped sequence was less than 30%. The point would not be a candidate unless it was a “clip”  
32  
33  
34 140 and the mismatch was less than 5 bp or contained poly-A/T.

35  
36 141 Some terminals of reads containing mismatched bases may be the clipped parts because  
37  
38  
39 142 these bases were treated as mismatches rather than clips. The breakpoints candidates were  
40  
41  
42 143 re-estimated by SID if mismatches accounted for greater than half of the read terminals.

43  
44 144 Notably, we implemented the “Asynchronous Scanning” algorithm (Additional file 2: Text  
45  
46  
47 145 S2). Using this algorithm, once the program clustered one possible insertion region by  
48  
49  
50 146 scanning unique reads, the process of breakpoint detection in this region was immediately  
51  
52  
53 147 performed, rendering it possible to detect TE insertions in one chromosome in only a few  
54  
55  
56 148 minutes. The detailed algorithm for RIP candidate determination is provided in Additional file 2:  
57  
58  
59 149 Text S2.

150 **Annotation of TE insertions**

1  
2  
3 151 *Orientation annotation for the TE insertions.* We annotated the orientation of TE insertions  
4  
5 152 based on the BLAST results [23]. First, we extracted the discordant repeat anchored mate  
6  
7  
8 153 (RAM) reads and clipped reads that supported the TE insertion and made the reads'  
9  
10  
11 154 orientations the same as HG19. Then, we realigned the supporting reads against the  
12  
13 155 consensus sequences of known active retrotransposons to identify the mapped orientation in  
14  
15  
16 156 known active retrotransposons. The orientations of TE insertions were judged by the reads'  
17  
18  
19 157 orientation (for details see Additional file 2: Text S3). The accuracy of orientation annotation  
20  
21  
22 158 was assessed by comparing 396 matched insertions from dbRIP and 21 fully sequenced  
23  
24  
25 159 insertions from PCR validation experiments (Additional file 1: Table S2). In total, 326 insertions  
26  
27  
28 160 were verified, and the FDR of orientation annotation was 21.82%.

29  
30 161 *Subfamily annotation for RIPs.* The subfamily annotation of RIPs was performed according to  
31  
32  
33 162 known active retrotransposons. We first constructed a comprehensive retrotransposons  
34  
35  
36 163 sequence library. Alu subfamily consensus sequences were acquired from RepBase 17.07  
37  
38  
39 164 [20]. L1 subfamily consensus sequences were acquired from Eunjung Lee [10]. SVA and LTR  
40  
41  
42 165 consensus sequences were acquired from Baillie [24]. Next, we performed multiple subfamily  
43  
44  
45 166 sequence alignment for each type of retrotransposon and discovered the diagnostic nucleotide  
46  
47  
48 167 for each subfamily (for details see Additional file 1: Table S3-5). Specially, we discovered the  
49  
50  
51 168 diagnostic nucleotide of L1 from previous studies [25-28]. We then assembled the “discordant  
52  
53  
54 169 reads” of each RIP into contigs using CAP3 [29] and realigned them against all of the  
55  
56  
57 170 subfamily sequences using BLAST (NCBI BLAST , RRID:SCR\_004870)[30] (Additional file 2:  
58  
59  
60 171 Text S3-4).

1 172 *Length annotation for RIPs.* During mapping the contigs to subfamily sequences, we identified  
2  
3 173 the first mapped site of the 5' and 3' ends of the subfamily sequence and accordingly counted  
4  
5  
6 174 the lengths from the initial site ( $L_{min}$  and  $L_{max}$ ). The length of inserted retrotransposon ( $L_{retro}$ )  
7  
8  
9 175 was calculated as the difference between the maximum and the minimum length of the aligned  
10  
11  
12 176 sequence, as follows:

$$L_{retro} = L_{max} - L_{min} + 1.$$

### 178 **Simulation of RIP data**

179 In total, 761 TEs were randomly selected from our reference TE database (see Materials and  
180 methods: Annotation of TE insertions) and inserted into HG19 autosomes randomly to  
181 generate a new human genome (for details see Additional file 1: Table S6). The pIRS [31]  
182 software was used to generate approximately 60× paired-end 100 bp reads; then, we mapped  
183 these reads to the HG19 genome by BWA. Then, we used SID to detect these RIPs in the  
184 simulated genome. By repeating this process, we obtained results from simulated data with  
185 different depths to assess the sensitivity and specificity of RIP detection in sequence data with  
186 distinct depth using SID.

### 187 **Reference RIP detection**

188 The reference RIPs were detected as a subset of deletions of the samples relative to the HG19  
189 reference (Additional file 2: Figure S1). These deletions were selected from the results of  
190 structural variation (SV) detection of YH90 samples, and the RIPs were annotated based on  
191 matched deletion coordinates to HG19 annotation of RepeatMasker (greater than 90% of them  
192 overlap with each other) [32].

193 The reference RIPs should be absent in the chimpanzee genome. The alignments of

1 194 chimpanzee mapped to the human genome were downloaded from UCSC  
2  
3 195 (<http://hgdownload.cse.ucsc.edu>). One reference RIP candidate should correspond to a gap  
4  
5  
6 196 with an overlap of greater than 90% to each other, and no gaps were present in the  
7  
8  
9 197 chimpanzee genome at this locus. The RIP candidates were filtered if no polymorphisms were  
10  
11  
12 198 present in the YH90 samples (i.e., the allele frequency was equal to 180).

## 14 199 **Results**

### 16 200 **Establishment of SID**

19 201 To detect non-reference RIPs from WGS data accurately and in a time-efficient manner, we  
20  
21  
22 202 developed SID, which can detect non-reference RIPs easily and quickly through discordant  
23  
24  
25 203 reads detection and reads clustering. In the first step, three types of informative discordant  
26  
27  
28 204 reads were selected for further analysis (Fig. 1a). Then, the reads that had mismatched bases  
29  
30  
31 205 at the terminals (Fig. 1b, 1c) were used for judging heterozygosity. The clipped reads were  
32  
33  
34 206 used to confirm the sequence of TSD and the precise insertion site of certain TEs.

### 36 207 **Non-reference retrotransposon insertion calling**

38 208 To investigate the influence of sequencing depth on RIP detection sensitivity and accuracy, we  
39  
40  
41 209 simulated sequence data at different depths. Detection sensitivity dramatically increased with  
42  
43  
44 210 increasing sequencing depth and achieved 95% (730/761) when the sequencing depth was  
45  
46  
47 211 greater than 30x. By contrast, detection accuracy slightly changed with increasing sequencing  
48  
49  
50 212 depth (Fig. 2a).

52 213 We next estimated the RIP detection sensitivity using two real sequencing datasets. One  
53  
54  
55 214 dataset was the CEU trio data, which was deep-sequenced (> 75x) Illumina HiSeq data  
56  
57  
58 215 generated by the Broad Institute (father NA12891, mother NA12892 and the female offspring

1 216 NA12878) from the 1000GP. We first used SID to detect the RIPs of each individual in the CEU  
2  
3 217 dataset and evaluated the sensitivity by comparing the detection results with the  
4  
5  
6 218 PCR-validated datasets from Stewart et al. [12]. For Alu, the mean sensitivity reached 96.3%  
7  
8  
9 219 among individuals. We also obtained a mean sensitivity of 80.3% and 83.3% for L1 and SVA,  
10  
11 220 respectively (Additional file 1: Table S7).

12  
13  
14 221 The other dataset, including NA18571, NA18572 and NA18537, was also recruited in  
15  
16  
17 222 1000GP. The RIP datasets of these three individuals detected by SID were larger and covered  
18  
19  
20 223 70.08% of the same sample's results in 1000GP on average (Additional file 2: Figure S2). We  
21  
22 224 estimated RIP detection accuracy using the sequencing data from a lymphocytic cell line  
23  
24  
25 225 (YH\_CL, ~52x) obtained from an Asian individual. These data represent the first Asian diploid  
26  
27  
28 226 genome dataset, and we performed PCR validation. We randomly selected 103 detected RIPs,  
29  
30  
31 227 and 93/96 (7 loci were removed because of the poor primer specificity) loci were successfully  
32  
33  
34 228 validated, indicating that SID had an accuracy of 90.29% - 96.88% (Additional file 1: Table S8  
35  
36  
37 229 and Additional file 2: Figure S3 and Text S5). We also used the PCR validation result to assess  
38  
39  
40 230 the accuracy of genotyping, which was approximately 93.55% (87/93, Fig. 2b, Additional file 2:  
41  
42 231 Text S6).

43  
44  
45 232 We next compared the RIP detection efficiency of different methods (SID, RetroSeq [11]  
46  
47  
48 233 and TEA [10]) using YH\_CL and three samples (NA18571, NA18572 and NA18537) from  
49  
50  
51 234 YH90 (Additional file 2: Text S7). The run time of SID was approximately 3-fold reduced  
52  
53  
54 235 compared with the other two methods, suggesting that SID was the most time-saving method  
55  
56  
57 236 among the three methods (Additional file 2: Table S9). SID and TEA had comparable  
58  
59  
60 237 sensitivities that were increased compared with RetroSeq (Additional file 2: Figure S4). We

1 238 also validated the uniquely detected RIPs by PCR (Additional file 1: Table S10) with an  
2  
3 239 accuracy of 75.86% (22/29) and 77.78% (7/9) for Alu and L1, respectively, revealing a higher  
4  
5  
6 240 RIP detection accuracy (Alu: 42.10% (8/19) and 82.61% (19/23) and L1: 66.67% (2/3) and  
7  
8  
9 241 66.67% (2/3) for RetroSeq and TEA, respectively).

## 10 11 242 **A comprehensive RIP landscape of the Han Chinese population**

12  
13  
14 243 We then performed RIP detection on a much larger scale. We sequenced 90 Han Chinese  
15  
16  
17 244 individuals and generated Illumina paired-end sequence data at an average depth of 68x for  
18  
19  
20 245 each sample (Additional file 1: Table S1). Using SID, the high depth of the dataset (much more  
21  
22  
23 246 than 30x) allowed us to build a comprehensive non-reference RIP landscape with high  
24  
25  
26 247 confidence[16].

27  
28 248 In total, we identified 9342 non-reference RIPs in autosome regions, including 6483 Alu  
29  
30  
31 249 elements, 2398 L1s, 61 LTRs and 400 SVAs (Fig. 3a; for details, see Additional file 1: Table  
32  
33  
34 250 S11 and Additional file 2: Text S8). Of this dataset, 8433 RIPs, including 5826 Alu elements,  
35  
36  
37 251 2169 L1s, 383 SVAs, and 55 LTRs, were novel compared with dbRIP (Fig. 3b). The average  
38  
39  
40 252 number of non-reference RIPs per individual was 1394 (ranging from 1304 to 1493, Fig. 3c),  
41  
42  
43 253 including 1110.80 Alu elements, 231.34 L1s, 43.14 SVAs and 9.01 LTRs, and each type of RIP  
44  
45  
46 254 had a similar proportion ( $P = 0.6364$ ,  $P = 0.2711$ ,  $P = 0.2128$ ,  $P = 0.5582$ , respectively,  
47  
48  
49 255 Wilcoxon signed-rank test). We compared pair-wise individuals of all 90 samples, and the  
50  
51  
52 256 average specific loci number was 672.79, which is approximately half (48.25%) of  
53  
54  
55 257 non-reference RIPs of one individual.

56 258 We next compared our results with the 1000GP SV dataset. In total, 34.94% (3264/9342)  
57  
58  
59 259 of RIPs in YH90 were also found in the 1000GP dataset. The Pearson correlation coefficient

1 260 was 0.7998 ( $P < 2.2 \times 10^{-16}$ ) between YH90 and all the 26 populations in 1000GP SV dataset.

2  
3 261 The Pearson correlation coefficient was 0.8856 between YH90 and the East Asian (EAS)

4  
5  
6 262 population in 1000GP, which was higher than other populations ( $r = 0.7662$ ,  $r = 0.5741$ ,  $r =$

7  
8  
9 263  $0.7025$  and  $r = 0.7627$  for American (AMR), African (AFR), European (EUR) and South Asian

10  
11 264 (SAS) populations, respectively. Additional file 2: Text S9)[14].

12  
13  
14 265 Specific insert location information enabled us to investigate genome-wide sequence

15  
16  
17 266 patterns of these non-reference RIPs. We observed that the non-reference RIPs varied among

18  
19  
20 267 chromosomes (Fig. 3d, e). Notably, we found that the two different subpopulations (from

21  
22 268 southern and northern China) had similar patterns of RIP distribution ( $r = 0.782$ , Fig. 3e and for

23  
24  
25 269 details see Additional file 2: Figure S5). However, the distribution of non-reference RIPs was

26  
27  
28 270 not obviously correlated with GC content, fixed RIPs, or SNPs of the same sample within 10M

29  
30  
31 271 non-N bins (Additional file 2: Figure S6).

32  
33  
34 272 To further investigate the distribution of non-reference RIPs in the functional region, we

35  
36 273 annotated all the inserted loci (Fig. 3f). Greater than half of RIPs (4828/9342) were located in

37  
38  
39 274 gene regions, and the majority of these were located in introns. Only 5/9342 RIPs were located

40  
41  
42 275 in protein-coding regions, including three genes, C1orf66 (Alu-inserted), SNX31 (Alu-inserted)

43  
44  
45 276 and APH1B (SVA-inserted), with low frequency (1/90) and two genes, ADORA3 (Alu-inserted)

46  
47  
48 277 and Slco1b3 (L1-inserted), with higher frequency (44/90 and 12/90, respectively). In addition to

49  
50  
51 278 gene regions, we also found that on average 9.78% and 4.93% RIPs were located in enhancer

52  
53 279 regions and promoter regions per sample, respectively (Fig. 3f).

54  
55 280 Furthermore, we annotated the subfamily, orientation and sequence length of all detected

56  
57  
58 281 inserted retrotransposons based on regional sequence assembly and remapping to the



1 282 retrotransposon library. The AluY sub-family constituted essentially all non-reference Alu  
2  
3 283 insertions, in which AluYa5 and AluYb8 were mostly active (Additional file 1: Table S11),  
4  
5  
6 284 supporting conclusions from previous studies [26, 33, 34].  
7

8  
9 285 The orientation of one RIP is determined from the mapping orientation of contigs to a  
10  
11 286 retrotransposon reference and the existence of poly-A or poly-T tails of the inserted sequence  
12  
13 287 (Additional file 1: Table S11). Previous studies have reported that the gene-inserted RIP had a  
14  
15  
16 288 greater influence on gene expression if it was inserted on the same orientation as the target  
17  
18  
19 289 gene [2, 35]. However, we detected a comparable number of direct and reverse events (0.475  
20  
21  
22 290 and 0.525, respectively), arguing against an obvious natural selection on the RIPs with  
23  
24  
25 291 consistent orientation with the inserted gene.  
26

27  
28 292 Along with subfamily and orientation annotation, we also calculated the length of each  
29  
30  
31 293 insertion sequence. We found that different types of TE insertions had different length  
32  
33  
34 294 distributions (Additional file 2: Figure S7). Greater than half of Alu elements (~70%) were  
35  
36  
37 295 full-length, whereas the length of the L1 was distributed more discretely. Most L1s (> 80%)  
38  
39 296 were fractured during the process of retrotransposon, which is consistent with a previous study  
40  
41  
42 297 [13].  
43

#### 44 298 **RIPs of a healthy population**

45  
46  
47  
48 299 The pure and comprehensive RIP dataset can be used as a baseline of healthy people for  
49  
50  
51 300 other disease-related research, especially single-gene diseases. The candidate  
52  
53  
54 301 disease-related retrotransposon insertions found in this dataset were filtered. We explicitly  
55  
56  
57 302 measured the overlap between our dataset and the disease-related retrotransposon insertion  
58  
59 303 data in dbRIP (<http://dbrip.org>) [36]. None of the insertion sites existed in our dataset,  
60

1 304 indicating the accuracy of the database. We also tested some cancer research data. We  
2  
3 305 tested the dataset of candidate cancer-related somatic retrotransposon insertions that was  
4  
5  
6 306 strictly generated from data of The Cancer Genome Atlas (TCGA) Pan-Cancer Project for 11  
7  
8  
9 307 tumor types. No overlapping RIPs were detected, whereas 43.36% germline retrotransposons  
10  
11  
12 308 were detected. According to the comparison of colon cancer-specific data [9], we identified two  
13  
14 309 L1 insertions consistent with our dataset with frequency of 51/90 and 50/90. These two L1  
15  
16  
17 310 insertions were germline retrotransposon insertions that were further validated by PCR  
18  
19  
20 311 validation in Solyom's research. We also tested the candidate hepatocellular  
21  
22  
23 312 carcinoma-specific insertions [8] and identified one L1 insertion that was also present in our  
24  
25 313 dataset with a frequency of 9/90. This site was finally validated as a germline insertion by PCR  
26  
27  
28 314 in that research. In conclusion, our data provide a reference panel to exclude false positive  
29  
30  
31 315 insertions related to cancer.

### 32 33 34 316 **Population evolution analysis**

35  
36 317 To perform the population evolution analysis of RIPs, we first merged the non-reference RIP  
37  
38  
39 318 dataset with the "reference" retrotransposon insertions that were polymorphic in YH90  
40  
41  
42 319 samples (Additional file 2: Figure S1) to obtain all RIPs from our samples. The retrotransposon  
43  
44  
45 320 insertions with a frequency equal to 1 were removed from our non-reference RIPs. The  
46  
47  
48 321 "reference" RIPs were defined as the reference genome-specific retrotransposon insertions  
49  
50  
51 322 compared with each individual of the YH90 group. These reference RIPs were selected from  
52  
53 323 the dataset of YH90 deletions, and only the RIPs absent in chimpanzee were retained.

54  
55  
56 324 Allele frequency spectrum (AFS) was not only influenced by the natural selection but also  
57  
58  
59 325 by demographic history. For example, a low-frequency bias for the majority of mutations can

1 326 also be obtained if the population recently experienced a bottleneck [37].

2  
3 327 To perform the neutral test more accurately, we took the demographic history into  
4  
5  
6 328 consideration (Additional file 2: Text S10). We simulated the following two different  
7  
8  
9 329 demographic scenarios: a two-epoch population with a recent contraction and a three-epoch  
10  
11 330 bottleneck-shaped history containing a reduction of effective population size in the past  
12  
13  
14 331 followed by a recent phase of size recovery (Fig. 4a). We tested the different assumptions with  
15  
16  
17 332 the SNP dataset (Fig. 4b and Additional file 2: Table S12), which supported that the  
18  
19  
20 333 three-epoch model was the best model.

21  
22 334 Next, we explored the possibility of using RIP information to perform population evolution  
23  
24  
25 335 analysis. Based on the genotyping result of the merged RIP dataset, we described the RIP  
26  
27  
28 336 AFS (Fig. 4c and Additional file 2: Text S11). The neutral model expectation can be calculated  
29  
30  
31 337 using the formula  $\theta/i$ , where  $\theta$  is the insertion diversity parameter and  $i$  (180) is the allele  
32  
33  
34 338 count in a fixed number of samples  $n$  (90) [37]. The spectrum was skewed toward low-allele  
35  
36  
37 339 frequency compared with the distribution of the expected neutral model, indicating possible  
38  
39 340 negative selection pressure on retrotransposon insertions.

40  
41  
42 341 To investigate the influence of the demographic history on RIP AFS, we performed  
43  
44  
45 342 demographic correction and re-analyzed the RIP AFS under different selection models (Fig. 4d  
46  
47  
48 343 and Additional file 2: Figure S8-9). The classification of neutral with negative and positive  
49  
50  
51 344 selection indicates that a proportion of RIPs was neutral, and a proportion of RIPs was under  
52  
53 345 negative selection. In addition, other RIPs were under positive selection (m1), neutral with  
54  
55  
56 346 negative selection (m2), neutral with positive selection (m3), negative selection (m4), positive  
57  
58  
59 347 selection (m5), and neutral selection (m6). We further calculated the selection coefficient ( $S'$ )

1 348 under each best-fit model with the determination of an approximately neutral selection effect  
2  
3 349 threshold ( $S' < 0.01\%$ ) [38]. Models m1 and m2 were the most fitted models with the observed  
4  
5  
6 350 RIP AFS (Additional file 2: Table S13). The best-fit result of model m1 demonstrated that  
7  
8  
9 351 approximately 75% RIPs were under negative selection with  $s = 0.0290\%$ , which indicates that  
10  
11  
12 352 these RIPs are weakly deleterious. In addition, 10% were under positive selection, whereas 15%  
13  
14  
15 353 were neutral. Under model m2, the best-fit result demonstrated that 70% of RIPs were under  
16  
17  
18 354 negative selection with  $s = 0.0396\%$ . In addition, 30% of RIPs were neutral. The selection  
19  
20  
21 355 coefficient was  $0.0079\%$  under the all negative selection model, indicating an approximately  
22  
23 356 neutral selection effect.

24  
25 357 The distribution of fitness effects of retrotransposon subfamilies (L1, SVA and Alu) was  
26  
27  
28 358 also estimated under the same demographic model. Assuming that all RIPs of different  
29  
30  
31 359 subfamilies were under negative selection (model m1), the selection coefficient models were  
32  
33  
34 360 various among three subfamilies of RIPs ( $S' = -0.0143\%$ ,  $S' = -0.0172\%$ ,  $S' = -0.0068\%$  for L1,  
35  
36  
37 361 SVA and Alu, respectively), suggesting that there is more natural selection pressure on L1 and  
38  
39  
40 362 SVA (weakly negative selection) compared with Alu (nearly neutral selection).

### 41 363 **Phylogenetic analysis**

42  
43  
44 364 To investigate whether RIP information can be used to separate the Northern and Southern  
45  
46  
47 365 Chinese groups, we performed principal component analysis (PCA) using the RIPs detected  
48  
49  
50 366 from the YH90 dataset, which provided well-resolved Northern and Southern Chinese groups  
51  
52  
53 367 (Fig. 5a and Additional file 2: Text S12). Compared with the PCA result derived from the SNPs  
54  
55  
56 368 detected from the same dataset (Fig. 5b), there seemed to be more overlapping observations,  
57  
58  
59 369 indicating SNPs might be more informative in resolving the two distinctive populations. Next,

1 370 we determined whether it is possible to perform phylogenetic analysis using RIP information  
2  
3 371 detected from the YH90 dataset. Two phylogenetic trees were constructed using RIPs and  
4  
5  
6 372 SNPs, separately (Fig. 5c and 5d; for details, see Additional file 2: Text S13). Similar to the  
7  
8  
9 373 PCA result, increased mixing between Northern and Southern Chinese individuals was  
10  
11 374 observed for the phylogenetic tree derived from the RIP information. Interestingly, HG00534,  
12  
13  
14 375 an isolated Southern Chinese individual located in a northern cluster in the phylogenetic tree  
15  
16  
17 376 established using the SNP information, clustered largely with Southern Chinese individuals in  
18  
19  
20 377 the phylogenetic tree derived from the RIP information. Future studies are warranted to  
21  
22  
23 378 explore whether combining SNPs with RIP results in the construction of a more accurate  
24  
25  
26 379 phylogenetic tree.

## 27 28 29 380 **Conclusions**

30  
31  
32  
33 381 In this paper, we developed the computer program SID to detect the non-reference RIPs of 90  
34  
35  
36 382 healthy Han Chinese individuals using high-depth WGS. We described the landscape of RIP  
37  
38  
39 383 distribution on population genomes and annotated the subfamily, orientation, and length of  
40  
41  
42 384 RIPs. We demonstrated that the RIPs could be used as a normal baseline for  
43  
44  
45 385 retrotransposon-related disease research.

46  
47 386 To our knowledge, this is the largest Han Chinese genomics dataset to date. Compared  
48  
49  
50 387 with 1000GP results from the same samples, approximately half (mean 48.05%; Additional file  
51  
52  
53 388 2: Figure S2) of RIPs in our dataset were previously observed, suggesting that our  
54  
55  
56 389 deep-sequenced data exhibited increased detection sensitivity compared with low coverage  
57  
58  
59 390 data. For example, serum ACE levels were determined by the Alu insertion/deletion (I/D)

1 391 polymorphism in the following order: DD > ID > II [39]. The D allele of the ACE gene was  
2  
3 392 associated with essential hypertension in different populations [40-43]. We found that the ACE  
4  
5  
6 393 gene harbored an Alu insertion in the 15<sup>th</sup> intron with a frequency of 81/90 in our 90 Chinese  
7  
8  
9 394 genomes compared with a considerably reduced frequency (7/63) in CEPH individuals [12],  
10  
11  
12 395 which was supported by a previous study [44]. To our surprise, no RIP ACEs were present in  
13  
14 396 Han Chinese samples from the 1000GP dataset, which is a high-frequency inserted gene in  
15  
16  
17 397 our RIP data. ACE-specific PCR validation (Additional file 2: Figure S10) and a previous ACE  
18  
19  
20 398 study [45] indicated that our results were consistent with the real values. This finding suggests  
21  
22  
23 399 that adequate sequencing depth is important to investigate RIP frequency and that our data  
24  
25  
26 400 present a result that is consistent with the actual situation. The highly sensitive and accurate  
27  
28  
29 401 RIP dataset provided a perfect opportunity to perform RIP fitness analysis. This study  
30  
31  
32 402 evaluates the natural selection effect on retrotransposon insertions at the population level. As  
33  
34 403 a type of long fragment insertion, RIPs are under approximately neutral selection. This finding  
35  
36  
37 404 is consistent with our result that retrotransposon insertions are mostly relatively  
38  
39  
40 405 inconsequential because the harbored genes are always relatively unimportant. Regarding  
41  
42 406 different types of RIPs in addition to Alu, the longer insertion elements L1 and SVA exhibit  
43  
44  
45 407 weakly positive selection pressure.

46  
47 408 This dataset can be compared with others to provide guidance in research of the  
48  
49  
50 409 disease-causing mechanisms in certain populations and to successfully determine the  
51  
52  
53 410 insertion time of a specific locus. This dataset can also be used as a standard for other RIP  
54  
55  
56 411 research and can serve as a baseline to filter irrelevant RIPs in disease-causing  
57  
58  
59 412 retrotransposon research. Genome-wide association studies (GWAS) have proven their utility

1 413 in identifying genomic variants associated with the risk for numerous diseases. Unlike SNPs  
2  
3 414 and copy number variations (CNVs) that are widely used in GWAS, RIPs have generally been  
4  
5  
6 415 overlooked as a major contributor to human variation. Significantly, this dataset provides a  
7  
8  
9 416 valuable resource to perform GWAS and identify more markers related to complex diseases.

10  
11 417 The high cost of WGS at high depth is still a major limitation, preventing it from being  
12  
13  
14 418 widely used in TE research. Furthermore, the large amount of data yielded by high-depth WGS  
15  
16  
17 419 makes it difficult to undertake bioinformatic analysis. With the development of biotechnology  
18  
19  
20 420 and IT, this situation should improve soon.

21  
22 421 The next step is to research RIPs at the transcriptome level. The impact of RIPs on gene  
23  
24  
25 422 expression remains unclear. Combining the genome and transcriptome would provide a  
26  
27  
28 423 comprehensive picture about the regulation of RIPs. Thus, we can further expound the  
29  
30  
31 424 position of the retrotransposon in the course of human evolution.

32  
33  
34 425

35  
36 426 **Availability and requirements**

- 37  
38  
39 427 ● Project name: Specific Insertions Detector (SID)  
40  
41  
42 428 ● Project home page: <https://github.com/Jonathanyu2014/SID>  
43  
44  
45 429 ● Operating system(s): Linux  
46  
47  
48 430 ● Programming language: Perl  
49  
50  
51 431 ● Other requirements: Perl 5.14 or later, BLAST v2.2.25 or later, Samtools v1.0 or later  
52  
53  
54 432 ● License: Apache License 2.0  
55  
56 433 ● Any restrictions to use by non-academics: None  
57  
58

59 434 **Additional files**

1 435 Additional file 1: Supplementary tables. Data description and the results of RIPs calling. (XLSX  
2  
3 436 1991 kb)

4  
5  
6 437 Additional file 2: Supplementary texts, figures and tables. (PDF 956 kb)

7  
8  
9  
10 438 **Abbreviations**

11  
12  
13 439 CNV, copy number variation; ENA, European Nucleotide Archive; GWAS, genome-wide  
14  
15  
16 440 association study; LTR, long terminal repeat; L1, long interspersed nuclear element 1; NGS,  
17  
18  
19 441 next-generation sequencing; PCA, principal component analysis; RIP, retrotransposon  
20  
21  
22 442 insertion polymorphism; SID, specific insertions detector; SNP, single nucleotide  
23  
24 443 polymorphism; TCGA, The Cancer Genome Atlas; TE, transposable element; TSD, target site  
25  
26  
27 444 duplication; WGS, whole-genome sequencing.

28  
29  
30 445 **Acknowledgments**

31  
32  
33  
34 446 We are grateful for Zengli Yan, Nan Li, Na Li and Runze Jiang for optimizing and testing the  
35  
36  
37 447 SID program. We thank Haoxiang Lin and Wenjuan Zhu for providing technical assistance to  
38  
39  
40 448 us. We thank Liang Wu and Xulian Shi for polishing the manuscript. We acknowledge the  
41  
42  
43 449 support by the 1000 Genomes Project Consortium. This work was supported by the Shenzhen  
44  
45 450 Municipal Government of China [JSGG20140702161347218] and  
46  
47  
48 451 [KQCX20150330171652450].

49  
50  
51  
52 452 **Availability of data and materials**

53  
54  
55 453 The source code of SID is available from the GitHub and Zenodo repositories[46]. The human  
56  
57  
58 454 (Homo sapiens) reference genome sequence (HG19) and its annotation files were



1 455 downloaded from UCSC Genome Bioinformatics (<http://genome.ucsc.edu/>). The raw  
2  
3 456 sequence data of YH\_CL is available from the ENA repository (accession number ERA000005)  
4  
5  
6 457 [47]. All the YH90 raw sequences have been released to the ENA repository (bioproject  
7  
8  
9 458 number: PRJEB11005) and the processed data is also available from the *GigaScience*  
10  
11  
12 459 GigaDB repository [48]. Snapshots of the code, alignments, and results files are also hosted in  
13  
14 460 GigaDB[49]. Protocols used for simulating reads for SNP Indel calling and detection of  
15  
16  
17 461 transportable element insertions are also hosted in the protocols.io repository[50, 51].  
18  
19  
20

## 21 462 **Authors' contributions**

22  
23  
24 463 BL, SL and YH initiated this project and reviewed the manuscript. QY, XZ, YZ and XH drafted  
25  
26  
27 464 the manuscript. XH and JL edited the manuscript. QY, WZ, XZ and YW performed the data  
28  
29  
30 465 analysis and drew the pictures. YZ and YW designed and developed the SID program. NL, XZ  
31  
32  
33 466 and GL conducted the experiment for sequencing. LX designed the primers and performed  
34  
35  
36 467 PCR validation. YH, BL, SL, XZ, XG and XH provided fruitful discussions.  
37  
38

## 39 468 **Competing interests**

40  
41  
42  
43 469 The authors declare that they have no competing interests.  
44  
45

## 46 470 **Author details**

47  
48  
49  
50 471 <sup>1</sup> BGI Education Center, University of Chinese Academy of Sciences, Shenzhen 518083,  
51  
52  
53 472 China. <sup>2</sup> BGI-Shenzhen, Shenzhen 518083, China. <sup>3</sup> BGI College, Shenzhen 518083, China.  
54  
55  
56  
57  
58  
59  
60  
61  
62  
63  
64  
65

1 473 <sup>4</sup> Department of Biology, University of Copenhagen, Copenhagen 1599, Denmark.. <sup>5</sup> School of  
2  
3 474 Biology and Biological Engineering, South China University of Technology, Guangzhou  
4  
5  
6 475 510641, China. <sup>6</sup> BGI-Forensics, Shenzhen 518083, China.  
7  
8

9  
10 476 **Ethics, consent and permissions**

11  
12  
13 477 This study was approved by BGI-IRB (NO. 16101).  
14  
15

16  
17 478 **Consent to publish**

18  
19  
20 479 Both BGI-IRB and participants involved consented to publish this research.  
21  
22

23 480  
24  
25

26  
27 481 **References**

- 28  
29  
30 482 1. Lander ES, Linton LM, Birren B, Nusbaum C, Zody MC, Baldwin J, et al. Initial sequencing  
31  
32 483 and analysis of the human genome. *Nature*. 2001;409 6822:860-921.  
33  
34  
35 484 2. Cordaux R and Batzer MA. The impact of retrotransposons on human genome evolution.  
36  
37 485 *Nature reviews Genetics*. 2009;10 10:691-703. doi:10.1038/nrg2640.  
38  
39  
40 486 3. Kidd JM, Graves T, Newman TL, Fulton R, Hayden HS, Malig M, et al. A human genome  
41  
42 487 structural variation sequencing resource reveals insights into mutational mechanisms. *Cell*.  
43  
44 488 2010;143 5:837-47. doi:10.1016/j.cell.2010.10.027.  
45  
46  
47 489 4. Brouha B, Schustak J, Badge RM, Lutz-Prigge S, Farley AH, Moran JV, et al. Hot L1s account  
48  
49 490 for the bulk of retrotransposition in the human population. *Proceedings of the National*  
50  
51 491 *Academy of Sciences of the United States of America*. 2003;100 9:5280-5.  
52  
53 492 doi:10.1073/pnas.0831042100.  
54  
55  
56  
57  
58  
59  
60  
61  
62  
63  
64  
65

1 493 5. Xing J, Zhang Y, Han K, Salem AH, Sen SK, Huff CD, et al. Mobile elements create structural  
2  
3 494 variation: analysis of a complete human genome. *Genome research*. 2009;19 9:1516-26.  
4  
5  
6 495 doi:10.1101/gr.091827.109.  
7  
8  
9 496 6. Cordaux R, Hedges DJ, Herke SW and Batzer MA. Estimating the retrotransposition rate of  
10  
11 497 human Alu elements. *Gene*. 2006;373:134-7. doi:10.1016/j.gene.2006.01.019.  
12  
13  
14 498 7. Hancks DC and Kazazian HH, Jr. Active human retrotransposons: variation and disease. *Curr*  
15  
16 499 *Opin Genet Dev*. 2012;22 3:191-203. doi:10.1016/j.gde.2012.02.006.  
17  
18  
19 500 8. Shukla R, Upton KR, Munoz-Lopez M, Gerhardt DJ, Fisher ME, Nguyen T, et al. Endogenous  
20  
21 501 retrotransposition activates oncogenic pathways in hepatocellular carcinoma. *Cell*. 2013;153  
22  
23 502 1:101-11. doi:10.1016/j.cell.2013.02.032.  
24  
25  
26  
27 503 9. Solyom S, Ewing AD, Rahrmann EP, Doucet T, Nelson HH, Burns MB, et al. Extensive somatic  
28  
29 504 L1 retrotransposition in colorectal tumors. *Genome research*. 2012;22 12:2328-38.  
30  
31 505 doi:10.1101/gr.145235.112.  
32  
33  
34  
35 506 10. Lee E, Iskow R, Yang L, Gokcumen O, Haseley P, Luquette LJ, 3rd, et al. Landscape of somatic  
36  
37 507 retrotransposition in human cancers. *Science*. 2012;337 6097:967-71.  
38  
39 508 doi:10.1126/science.1222077.  
40  
41  
42  
43 509 11. Keane TM, Wong K and Adams DJ. RetroSeq: transposable element discovery from  
44  
45 510 next-generation sequencing data. *Bioinformatics*. 2013;29 3:389-90.  
46  
47 511 doi:10.1093/bioinformatics/bts697.  
48  
49  
50  
51 512 12. Stewart C, Kural D, Stromberg MP, Walker JA, Konkel MK, Stutz AM, et al. A comprehensive  
52  
53 513 map of mobile element insertion polymorphisms in humans. *PLoS Genet*. 2011;7 8:e1002236.  
54  
55 514 doi:10.1371/journal.pgen.1002236.  
56  
57  
58  
59  
60  
61  
62  
63  
64  
65

1 515 13. Ewing AD and Kazazian HH, Jr. Whole-genome resequencing allows detection of many rare  
2  
3 516 LINE-1 insertion alleles in humans. *Genome research*. 2011;21 6:985-90.  
4  
5  
6 517 doi:10.1101/gr.114777.110.  
7  
8  
9 518 14. Sudmant PH, Rausch T, Gardner EJ, Handsaker RE, Abyzov A, Huddleston J, et al. An  
10  
11 519 integrated map of structural variation in 2,504 human genomes. *Nature*. 2015;526 7571:75-81.  
12  
13  
14 520 doi:10.1038/nature15394.  
15  
16  
17 521 15. Xing J, Witherspoon DJ and Jorde LB. Mobile element biology: new possibilities with  
18  
19  
20 522 high-throughput sequencing. *Trends in genetics : TIG*. 2013;29 5:280-9.  
21  
22  
23 523 doi:10.1016/j.tig.2012.12.002.  
24  
25  
26 524 16. Lan, T; Lin, H; Asker Melchior Tellier, L, C; Zhu, W; Yang, M; Liu, X; Wang, J; Wang, J; Yang,  
27  
28 525 H; Xu, X; Guo, X (2017): Deep whole-genome sequencing of 90 Han Chinese genomes.  
29  
30  
31 526 *GigaScience*. In Press.  
32  
33  
34 527 17. Wang J, Wang W, Li R, Li Y, Tian G, Goodman L, et al. The diploid genome sequence of an  
35  
36 528 Asian individual. *Nature*. 2008;456 7218:60-5. doi:10.1038/nature07484.  
37  
38  
39 529 18. Li H and Durbin R. Fast and accurate short read alignment with Burrows-Wheeler transform.  
40  
41  
42 530 *Bioinformatics*. 2009;25 14:1754-60. doi:10.1093/bioinformatics/btp324.  
43  
44  
45 531 19. McKenna A, Hanna M, Banks E, Sivachenko A, Cibulskis K, Kernytsky A, et al. The Genome  
46  
47 532 Analysis Toolkit: a MapReduce framework for analyzing next-generation DNA sequencing data.  
48  
49  
50 533 *Genome research*. 2010;20 9:1297-303. doi:10.1101/gr.107524.110.  
51  
52  
53 534 20. Jurka J, Kapitonov VV, Pavlicek A, Klonowski P, Kohany O and Walichiewicz J. Repbase  
54  
55 535 Update, a database of eukaryotic repetitive elements. *Cytogenet Genome Res*. 2005;110  
56  
57  
58 536 1-4:462-7. doi:10.1159/000084979.  
59  
60  
61  
62  
63  
64  
65

1 537 21. Wang J, Song L, Grover D, Azrak S, Batzer MA and P L. dbRIP: a highly integrated database of  
2  
3 538 retrotransposon insertion polymorphisms in humans. *Hum Mutat.* 2006;27 4:323-9.  
4  
5  
6 539 22. Hormozdiari F, Hajirasouliha I, Dao P, Hach F, Yorukoglu D, Alkan C, et al. Next-generation  
7  
8 540 VariationHunter: combinatorial algorithms for transposon insertion discovery. *Bioinformatics.*  
9  
10 541 2010;26 12:i350-7. doi:10.1093/bioinformatics/btq216.  
11  
12  
13  
14 542 23. Mount DW. Using the Basic Local Alignment Search Tool (BLAST). *CSH Protoc.*  
15  
16 543 2007;2007:pdb top17. doi:10.1101/pdb.top17.  
17  
18  
19 544 24. Baillie JK, Barnett MW, Upton KR, Gerhardt DJ, Richmond TA, De Sapio F, et al. Somatic  
20  
21 545 retrotransposition alters the genetic landscape of the human brain. *Nature.* 2011;479 7374:534-7.  
22  
23 546 doi:10.1038/nature10531.  
24  
25  
26  
27 547 25. Boissinot S, Chevret P and AV F. L1 (LINE-1) retrotransposon evolution and amplification in  
28  
29 548 recent human history. *Mol Biol Evol.* 2000;17 6:915-28.  
30  
31  
32  
33 549 26. Dombroski BA, Mathias SL, Nanthakumar E, Scott AF and Jr KH. Isolation of an active human  
34  
35 550 transposable element. *Science.* 1991;254 5039:1805-8.  
36  
37  
38  
39 551 27. Ovchinnikov I, Rubin A and GD S. Tracing the LINEs of human evolution. *Proceedings of the*  
40  
41 552 *National Academy of Sciences of the United States of America.* 2002;99 16:10522-7.  
42  
43  
44 553 28. Ovchinnikov I, Troxel AB and GD S. Genomic characterization of recent human LINE-1  
45  
46 554 insertions: evidence supporting random insertion. *Genome research.* 2001;11 12:2050-8.  
47  
48  
49  
50 555 29. Huang X and Madan A. CAP3: A DNA sequence assembly program. *Genome research.* 1999;9  
51  
52 556 9:868-77.  
53  
54  
55 557 30. Altschul SF, Gish W, Miller W, Myers EW and Lipman DJ. Basic local alignment search tool.  
56  
57 558 *Journal of molecular biology.* 1990;215 3:403-10.  
58  
59  
60  
61  
62  
63  
64  
65

1 559 31. Hu X, Yuan J, Shi Y, Lu J, Liu B, Li Z, et al. pIRS: Profile-based Illumina pair-end reads  
2  
3 560 simulator. *Bioinformatics*. 2012;28 11:1533-5.  
4  
5  
6 561 32. Tarailo-Graovac M and Chen N. Using RepeatMasker to identify repetitive elements in  
7  
8 562 genomic sequences. *Curr Protoc Bioinformatics*. 2009;Chapter 4:Unit 4 10.  
9  
10 563 doi:10.1002/0471250953.bi0410s25.  
11  
12  
13  
14 564 33. Hormozdiari F, Alkan C, Ventura M, Hajirasouliha I, Malig M, Hach F, et al. Alu repeat  
15  
16 565 discovery and characterization within human genomes. *Genome research*. 2011;21 6:840-9.  
17  
18 566 doi:10.1101/gr.115956.110.  
19  
20  
21  
22 567 34. Batzer MA and Deininger PL. Alu repeats and human genomic diversity. *Nature reviews*  
23  
24 568 *Genetics*. 2002;3 5:370-9. doi:10.1038/nrg798.  
25  
26  
27  
28 569 35. Burns KH and Boeke JD. Human transposon tectonics. *Cell*. 2012;149 4:740-52.  
29  
30 570 doi:10.1016/j.cell.2012.04.019.  
31  
32  
33  
34 571 36. Wang J, Song L, Grover D, Azrak S, Batzer MA and Liang P. dbRIP: a highly integrated  
35  
36 572 database of retrotransposon insertion polymorphisms in humans. *Hum Mutat*. 2006;27 4:323-9.  
37  
38 573 doi:10.1002/humu.20307.  
39  
40  
41  
42 574 37. Tajima F. Statistical method for testing the neutral mutation hypothesis by DNA polymorphism.  
43  
44 575 *Genetics*. 1989;123 3:585-95.  
45  
46  
47 576 38. Boyko AR, Williamson SH, Indap AR, Degenhardt JD, Hernandez RD, Lohmueller KE, et al.  
48  
49 577 Assessing the evolutionary impact of amino acid mutations in the human genome. *PLoS Genet*.  
50  
51 578 2008;4 5:e1000083. doi:10.1371/journal.pgen.1000083.  
52  
53  
54  
55 579 39. Rigat B, Hubert C, Alhenc-Gelas F, Cambien F, Corvol P and F S. An insertion/deletion  
56  
57 580 polymorphism in the angiotensin I-converting enzyme gene accounting for half the variance of

1 581 serum enzyme levels. *J Clin Invest.* 1990;86 4:1343-6.

2

3 582 40. Jeng JR, Harn HJ, Jeng CY, Yueh KC and SM S. Angiotensin I converting enzyme gene

4

5

6 583 polymorphism in Chinese patients with hypertension. *Am J Hypertens.* 1997;10 5Pt1:558-61.

7

8

9 584 41. Zee RY, Lou YK, Griffiths LR and BJ M. Association of a polymorphism of the angiotensin

10

11 585 I-converting enzyme gene with essential hypertension. *Biochem Biophys Res Commun.*

12

13 586 1992;184 1:9-15.

14

15

16

17 587 42. Asamoah A, Yanamandra K, Thurmon TF, Richter R, Green R, Lakin T, et al. A deletion in the

18

19 588 angiotensin converting enzyme (ACE) gene is common among African Americans with

20

21 589 essential hypertension. *Clin Chim Acta.* 1996;254 1:41-6.

22

23

24

25 590 43. Duru K, Farrow S, Wang JM, Lockette W and T K. Frequency of a deletion polymorphism in

26

27 591 the gene for angiotensin converting enzyme is increased in African-Americans with

28

29 592 hypertension. *Am J Hypertens.* 1994;7 8:759-62.

30

31

32

33 593 44. Anand SS, Yusuf S, Vuksan V, Devanesen S, Teo KK, Montague PA, et al. Differences in risk

34

35 594 factors, atherosclerosis, and cardiovascular disease between ethnic groups in Canada: the Study

36

37 595 of Health Assessment and Risk in Ethnic groups (SHARE). *Lancet.* 2000;356 9226:279-84.

38

39

40

41

42 596 45. Batzer MA, Stoneking M, Alegria-Hartman M, Bazan H, Kass DH, Shaikh TH, et al. African

43

44 597 origin of human-specific polymorphic Alu insertions. *Proceedings of the National Academy of*

45

46 598 *Sciences of the United States of America.* 1994;91 25:12288-92.

47

48

49

50 599 46. Qichao Yu. (2016, September 1). Specific Insertions Detector. Zenodo.

51

52 600 <http://doi.org/10.5281/zenodo.212115>

53

54

55 601 47. Zong C, Lu S, Chapman AR and Xie XS. Genome-wide detection of single-nucleotide and

56

57 602 copy-number variations of a single human cell. *Science.* 2012;338 6114:1622-6.

58

59

60

61

62

63

64

65

1 603 doi:10.1126/science.1229164.

2  
3 604 48. Lan, T; Lin, H; Asker Melchior Tellier, L, C; Zhu, W; Yang, M; Liu, X; Wang, J; Wang, J; Yang,  
4  
5  
6 605 H; Xu, X; Guo, X (2017): Supporting data for "Deep whole-genome sequencing of 90 Han  
7  
8  
9 606 Chinese genomes" GigaScience Database. <http://dx.doi.org/10.5524/100302>

10  
11 607 49. Yu, Q; Zhang, W; Zeng, Y; Zhang, X; Wang, Y; Wang, Y; Xu, L; Huang, X; Li, N; Zhou, X; Lu,  
12  
13  
14 608 J; Guo, X; Li, G; Hou, Y; Liu, S; Li, B (2017): Supporting data for "Population-wide Sampling  
15  
16  
17 609 of Retrotransposon Insertion Polymorphisms Using Deep Sequencing and Efficient Detection"  
18  
19  
20 610 GigaScience Database. <http://dx.doi.org/10.5524/100318>

21  
22 611 50 Haoxiang Lin: SNP INDEL calling. [protocols.io dx.doi.org/10.17504/protocols.io.grkbv4w](https://doi.org/10.17504/protocols.io.grkbv4w)

23  
24  
25 612 51. GigaScience Database: Simulating reads for detection of transportable element insertions.

26  
27  
28 613 [protocols.io. 2017. dx.doi.org/10.17504/protocols.io.imrcc56](https://doi.org/10.17504/protocols.io.imrcc56)

29 614

30 615

31  
32  
33  
34  
35 616 **Figure legends**

36  
37  
38  
39 617 **Fig. 1** The principle of retrotransposon insertion detection. (a) Schematic diagram of using SID  
40  
41 618 for RIP detection in the genome. TSD: target site duplication. SID: Specific Insertions Detector.

42  
43  
44 619 (b) An example of reads mapping for predicted homozygous insertions. (c) An example of  
45  
46  
47 620 reads mapping for predicted heterozygous insertions. In (b) and (c), the red bases indicate the  
48  
49  
50 621 mismatches, and the sequences with an orange background represent the clipped part of the  
51  
52  
53 622 reads. The clipped reads are derived from one allele with inserted retrotransposons, and the  
54  
55  
56 623 normal reads are derived from the other allele with the same reference. The three reads with  
57  
58 624 asterisks indicate no clipped part but the presence of terminal mismatches, which can also



1 625 support the breakpoint and exhibit consistency with the clipped reads.

2  
3  
4 626 **Fig. 2** Assessing the SID results. (a) Detecting accuracy and sensitivity estimation along  
5  
6  
7 627 cumulating sequencing depth of simulated data. (b) RIP genotyping of YH\_CL. PCR validation  
8  
9  
10 628 results are marked. HEE: estimated heterozygous site. HOE: estimated homozygous site.  
11  
12 629 HEV: validated heterozygous site. HOV: validated homozygous site. The dash line indicates  
13  
14  
15 630 the estimated boundary between heterozygous and heterozygous sites. Note that some of the  
16  
17  
18 631 validated RIPs are present in the same locus in the plot figure.

19  
20  
21 632 **Fig. 3** Comprehensive landscape of non-reference RIPs of YH90. (a) Proportions of novel  
22  
23  
24 633 insertions identified for each type of retrotransposon. (b) Comparison of YH90 non-reference  
25  
26  
27 634 RIP results with dbRIP. Adjacent 100-bp regions of RIPs were taken into consideration. (c) TE  
28  
29  
30 635 distribution of each YH90 sample. (d) Box plots of non-reference RIP distribution among  
31  
32  
33 636 autosomes. (e) TE frequency distribution among YH90 samples. Rings from outer to inner  
34  
35  
36 637 indicate Alu insertions frequency, L1 insertion frequency, SVA insertion frequency, LTR  
37  
38  
39 638 insertion frequency and cytoband structure. The inside frequency of the rings indicates the  
40  
41  
42 639 insertion frequency for the Northern Chinese group, and the outside frequency represents that  
43  
44  
45 640 of the Southern Chinese group. (f) RIP distribution in different functional regions of the  
46  
47  
48 641 genome.

49  
50 642 **Fig. 4** Population genetics analysis based on YH90. (a) A two-epoch population with a recent  
51  
52  
53 643 contraction; a three-epoch bottleneck-shaped history, which contained a reduction of the  
54  
55  
56 644 effective population size in the past followed by a recent phase of size recovery. Details of the  
57  
58  
59 645 parameters for all models are provided in Additional file 2: Table S12. (b) The observed SNP

1 646 frequency spectra and expected neutral SNP frequency spectra under different demographic  
2  
3 647 models. (c) Observed and expected RIP site frequency spectra before demographic correction  
4  
5  
6 648 of each subfamily. (d) Assessing the evolutionary impact of RIPs in the human genome. The  
7  
8  
9 649 allele frequency distribution of RIPs was compared among observed, neutral models and  
10  
11  
12 650 negative models after demographic correction.

13  
14  
15 651 **Fig. 5** Phylogenetic analysis using RIPs and SNPs. (a) The detected RIPs were used for PCA.  
16  
17  
18 652 Each dot represents a sample from YH90 and is plotted as scatterplot using PC1 and PC2.  
19  
20  
21 653 Red indicates samples from individuals from northern China, and blue indicates individuals  
22  
23  
24 654 from southern China. (b) The detected SNPs were used for PCA. The plot layout and legend  
25  
26  
27 655 are the same as those presented in (a). (c) Phylogenetic tree constructed using the detected  
28  
29  
30 656 RIPs. HG19 (green) is used as a control. Red indicates samples from individuals from northern  
31  
32  
33 657 China, and blue indicates samples from individuals from southern China. (d) Phylogenetic tree  
34  
35  
36 658 constructed using the detected SNPs. HG19 (green) is used as a control. Plot layout and  
37  
38  
39 659 legend are same as that presented in (c).

Figure 1

## Sample genome

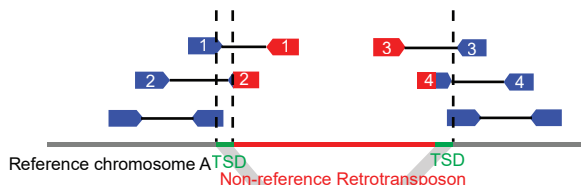

## Hg19 genome

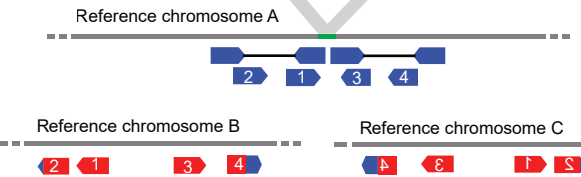

## Retrotransposon library

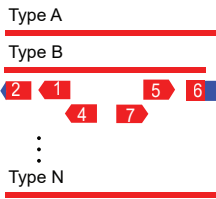

## Detection result

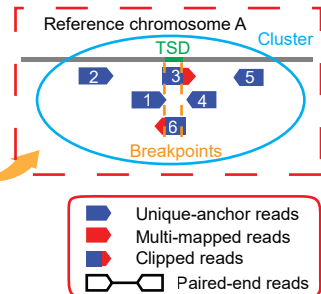

## B

[Click here to download Figure Fig. 1.pdf](#)

Reference AACTAGCTTAAAGTAGATTTTATT CAT CATA CCCTTCTACCTACGAAATTT

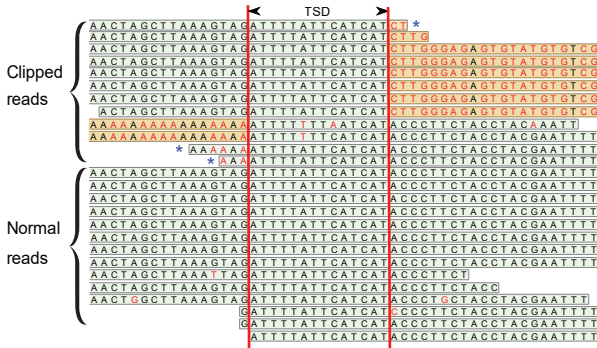

## C

Reference GGTTTACCAATTAGTCTCCCTTAAAGGGCACTGTTTATGATCATCACCACAAATGGATGCA

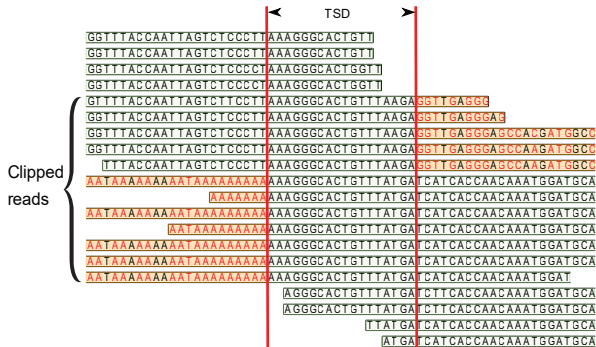

Figure 2

[Click here to download Figure Fig. 2.pdf](#)

A

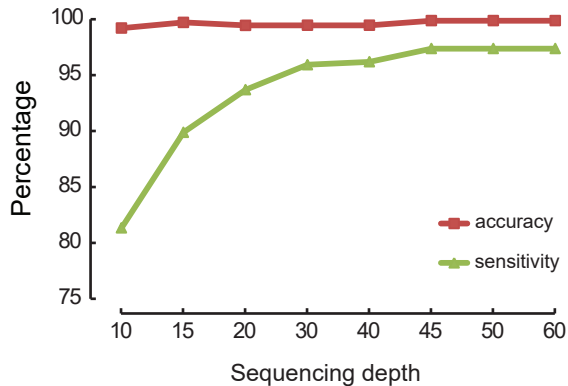

B

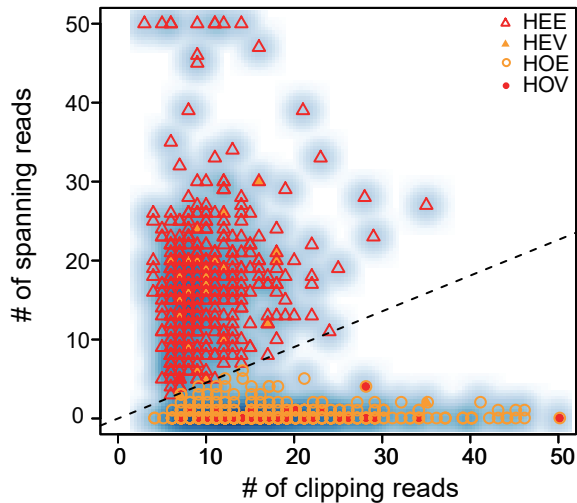

Figure 3

[Click here to download Figure Fig. 3.pdf](#)

A

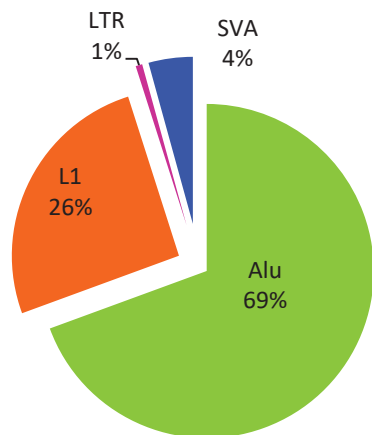

B

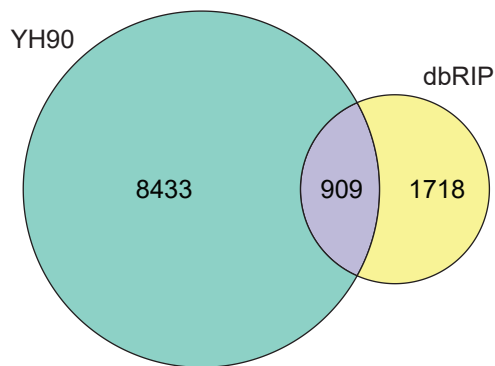

C

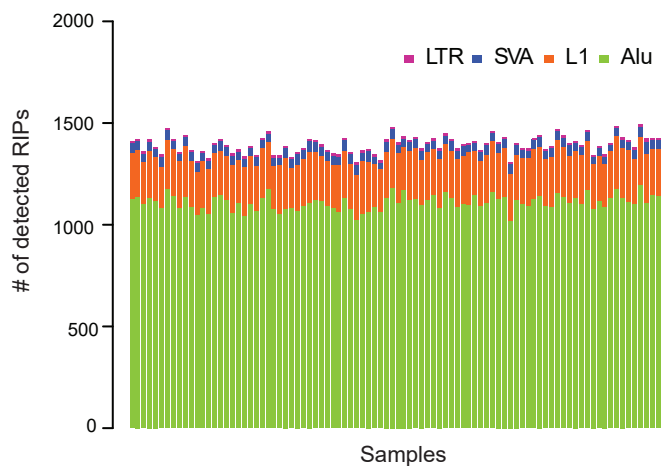

D

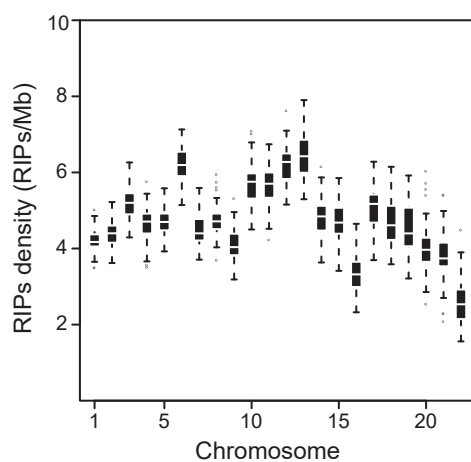

E

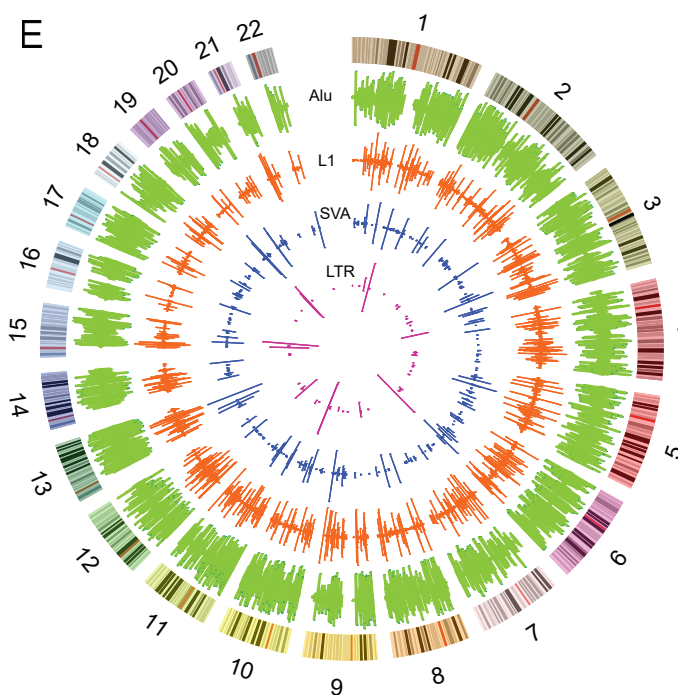

F

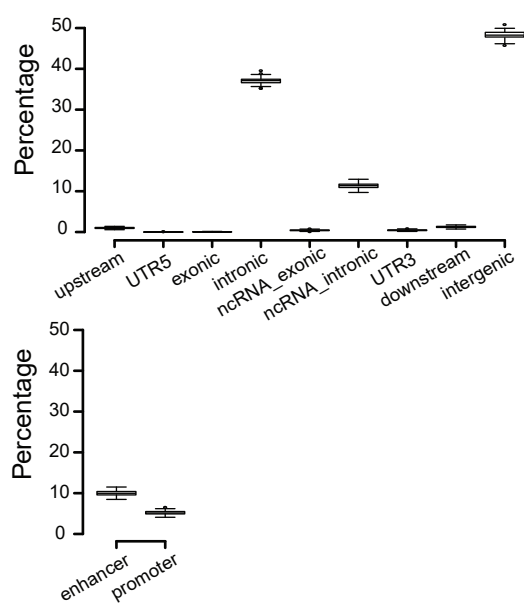

**Figure 4**

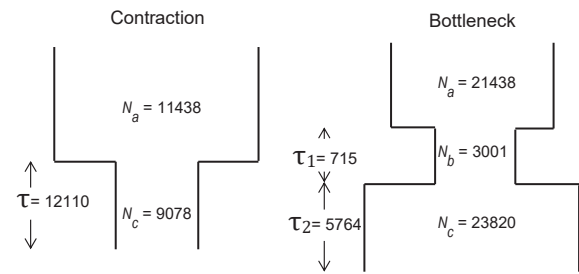

**B** [Click here to download Figure 4.pdf](#)

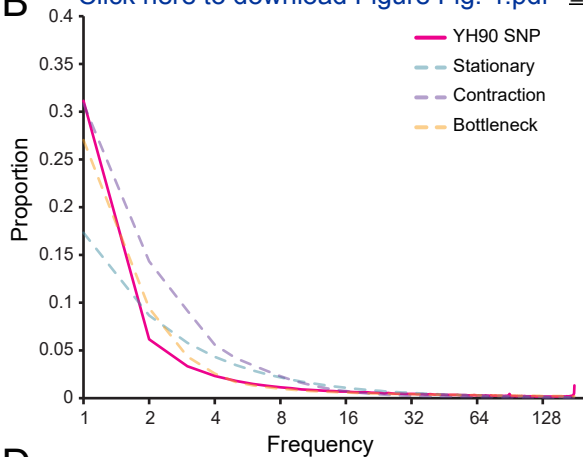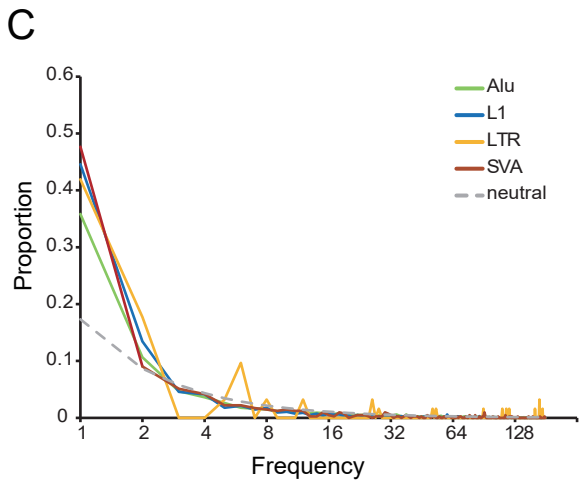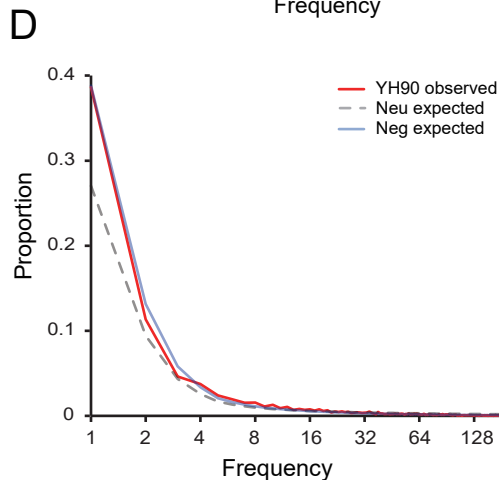





Click here to access/download  
**Supplementary Material**  
Additional file 1.xlsx



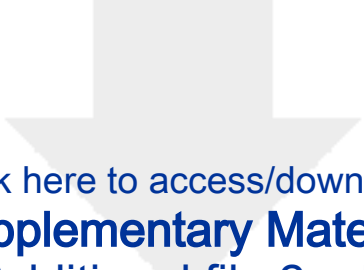

Click here to access/download  
**Supplementary Material**  
Additional file 2.pdf



Supplement: gix066_GIGA-D-16-00169_Revision-2.pdf [file gix066_GIGA-D-16-00169_Revision-2.pdf]
